# Supplementary material for: Application of Potassium along with Nitrogen under Varied Moisture Regimes Improves Performance and Nitrogen-Use Efficiency of High- and Low-Potassium Efficiency Cotton Cultivars
Source: MDPI journal article supplement (doi:10.3390/agronomy12020502), 2022-02-17
Supplement: s1 [file s1]

**Supplementary Table S1. Soil analysis characteristics used in pot**

| <b>Soil Characteristics</b>                  | <b>Before Sowing</b> |
|----------------------------------------------|----------------------|
| pH                                           | 8.11                 |
| EC <sub>e</sub> (μS cm <sup>-1</sup> )       | 300                  |
| Organic matter (%)                           | 0.75                 |
| Total-N (%)                                  | 0.010                |
| NO <sub>3</sub> -N (mg kg <sup>-1</sup> )    | 5.26                 |
| NaHCO <sub>3</sub> -P (mg kg <sup>-1</sup> ) | 11.5                 |
| NH <sub>4</sub> OAC-K (mg kg <sup>-1</sup> ) | 100                  |
| Textural Class                               | Silt loam            |

**Supplementary Table S2. Pearson's correlation matrix for nutrient use efficiency indices determining nutrient efficiency of cultivars under AWC-100%**

| Parameters | SCY                  | NAE                  | KAE                  | NPE                  | KPE                  | NARE                 | KARE                 | NEU                  | KEU                  | NIE                  | KIE                  | NER                  | KER                  | LN                  | LK      | NU      |
|------------|----------------------|----------------------|----------------------|----------------------|----------------------|----------------------|----------------------|----------------------|----------------------|----------------------|----------------------|----------------------|----------------------|---------------------|---------|---------|
| NAE        | 0.855**              | 1                    |                      |                      |                      |                      |                      |                      |                      |                      |                      |                      |                      |                     |         |         |
| KAE        | 0.887**              | 0.781**              | 1                    |                      |                      |                      |                      |                      |                      |                      |                      |                      |                      |                     |         |         |
| NPE        | -0.007 <sup>NS</sup> | -0.173 <sup>NS</sup> | 0.015 <sup>NS</sup>  | 1                    |                      |                      |                      |                      |                      |                      |                      |                      |                      |                     |         |         |
| KPE        | 0.089 <sup>NS</sup>  | 0.112 <sup>NS</sup>  | -0.253 <sup>NS</sup> | 0.262 <sup>NS</sup>  | 1                    |                      |                      |                      |                      |                      |                      |                      |                      |                     |         |         |
| NARE       | 0.851**              | 0.992**              | 0.733**              | -0.181 <sup>NS</sup> | 0.18 <sup>NS</sup>   | 1                    |                      |                      |                      |                      |                      |                      |                      |                     |         |         |
| KARE       | 0.864**              | 0.754**              | 0.991**              | 0.071 <sup>NS</sup>  | -0.278 <sup>NS</sup> | 0.708*               | 1                    |                      |                      |                      |                      |                      |                      |                     |         |         |
| NEU        | 0.820**              | 0.984**              | 0.681*               | -0.179 <sup>NS</sup> | 0.244 <sup>NS</sup>  | 0.996**              | 0.655*               | 1                    |                      |                      |                      |                      |                      |                     |         |         |
| KEU        | 0.873**              | 0.780**              | 0.997**              | 0.039 <sup>NS</sup>  | -0.262 <sup>NS</sup> | 0.735**              | 0.995**              | 0.683*               | 1                    |                      |                      |                      |                      |                     |         |         |
| NIE        | -0.038 <sup>NS</sup> | -0.119 <sup>NS</sup> | -0.014 <sup>NS</sup> | 0.918**              | 0.401 <sup>NS</sup>  | -0.143 <sup>NS</sup> | 0.028 <sup>NS</sup>  | -0.121 <sup>NS</sup> | 0.003 <sup>NS</sup>  | 1                    |                      |                      |                      |                     |         |         |
| KIE        | 0.251 <sup>NS</sup>  | 0.259 <sup>NS</sup>  | -0.04 <sup>NS</sup>  | 0.334 <sup>NS</sup>  | 0.967**              | 0.306 <sup>NS</sup>  | -0.068 <sup>NS</sup> | 0.361 <sup>NS</sup>  | -0.049 <sup>NS</sup> | 0.501 <sup>NS</sup>  | 1                    |                      |                      |                     |         |         |
| NER        | -0.158 <sup>NS</sup> | -0.271 <sup>NS</sup> | 0.131 <sup>NS</sup>  | 0.751**              | -0.347 <sup>NS</sup> | -0.349 <sup>NS</sup> | 0.186 <sup>NS</sup>  | -0.379 <sup>NS</sup> | 0.15 <sup>NS</sup>   | 0.697*               | -0.231 <sup>NS</sup> | 1                    |                      |                     |         |         |
| KER        | 0.295 <sup>NS</sup>  | 0.317 <sup>NS</sup>  | -0.036 <sup>NS</sup> | -0.038 <sup>NS</sup> | .888**               | 0.379 <sup>NS</sup>  | -0.109 <sup>NS</sup> | 0.424 <sup>NS</sup>  | -0.062 <sup>NS</sup> | 0.087 <sup>NS</sup>  | 0.883**              | -0.568 <sup>NS</sup> | 1                    |                     |         |         |
| LN         | 0.918**              | 0.827**              | 0.698*               | -0.21 <sup>NS</sup>  | 0.287 <sup>NS</sup>  | 0.862**              | 0.665*               | 0.851**              | 0.686*               | -0.222 <sup>NS</sup> | 0.382 <sup>NS</sup>  | -0.507 <sup>NS</sup> | 0.517 <sup>NS</sup>  | 1                   |         |         |
| LK         | 0.786**              | 0.625*               | 0.895**              | 0.217 <sup>NS</sup>  | -0.34 <sup>NS</sup>  | 0.581*               | 0.937**              | 0.53                 | 0.906**              | 0.137 <sup>NS</sup>  | -0.155 <sup>NS</sup> | 0.329 <sup>NS</sup>  | -0.297 <sup>NS</sup> | 0.551 <sup>NS</sup> | 1       |         |
| NU         | 0.966**              | 0.839**              | 0.768**              | -0.138 <sup>NS</sup> | 0.203 <sup>NS</sup>  | 0.863**              | 0.736**              | 0.842**              | 0.753**              | -0.18 <sup>NS</sup>  | 0.317 <sup>NS</sup>  | -0.388 <sup>NS</sup> | 0.436 <sup>NS</sup>  | 0.983**             | 0.639*  | 1       |
| KU         | 0.970**              | 0.817**              | 0.933**              | 0.06 <sup>NS</sup>   | -0.084 <sup>NS</sup> | 0.800**              | 0.935**              | 0.759**              | 0.929**              | 0.001 <sup>NS</sup>  | 0.09 <sup>NS</sup>   | 0.005 <sup>NS</sup>  | 0.072 <sup>NS</sup>  | 0.828**             | 0.910** | 0.895** |

SCY : Seed cotton yield

NAE :Nitrogen agronomic efficiency:

KAE : Potassium agronomic efficiency:

NPE : Nitrogen physiological efficiency

KPE : Potassium physiological efficiency

NARE :Nitrogen apparent recovery efficiency

KARE : Potassium apparent recovery efficiency

NEU : Nitrogen utilization efficiency

KEU : Potassium utilization efficiency

NIE : Nitrogen internal utilization efficiency

KIE : Potassium internal utilization efficiency

NER : Nitrogen efficiency ratio

KER : Potassium efficiency ratio

LN : Leaf nitrogen concentration

LK : Leaf Potassium concentration

NU : Total nitrogen uptake

KU : Total potassium uptake

= Highly significant at  $p \leq 0.01$ ; \* = Significant at  $p \leq 0.05$ ; NS = Non-significant

**Supplementary Table S3.** Effect of applied N: K levels on nutrient utilization and agronomy efficiency in cotton cultivars under varied irrigation levels.

| N: K levels<br>(mg pot <sup>-1</sup> ) | N utilization efficiency (mg mg <sup>-1</sup> ) |       |          |       |        | K utilization efficiency (mg mg <sup>-1</sup> ) |       |         |        |        |
|----------------------------------------|-------------------------------------------------|-------|----------|-------|--------|-------------------------------------------------|-------|---------|--------|--------|
|                                        | *100% AWC                                       |       | ‡50% AWC |       | Mean   | 100% AWC                                        |       | 50% AWC |        | Mean   |
|                                        | HKE                                             | LKE   | HKE      | LKE   |        | HKE                                             | LKE   | HKE     | LKE    |        |
| 0-0                                    | -                                               | -     | -        | -     | -      | -                                               | -     | -       | -      | -      |
| 375-0                                  | 11.4                                            | 9.2   | 5.3      | 4.0   | 7.5 c  | -                                               | -     | -       | -      | -      |
| 750-0                                  | 11.8                                            | 9.5   | 6.3      | 4.3   | 8.0 b  | -                                               | -     | -       | -      | -      |
| 0-208                                  | 0.0                                             | 0.0   | 0.0      | 0.0   | -      | 16.1                                            | 12.1  | 8.2     | 4.3    | 10.2 c |
| 375-208                                | 17.1                                            | 14.7  | 17.1     | 15.7  | 16.2 a | 30.9                                            | 26.5  | 30.9    | 28.3   | 29.2 a |
| 750-208                                | 9.4                                             | 8.4   | 9.4      | 10.5  | 9.4 ab | 11.0                                            | 10.5  | 19.0    | 21.8   | 15.6 b |
| Cv x MR                                | 8.3 a                                           | 7.0 b | 6.4bc    | 5.8c  |        | 9.7 a                                           | 8.2b  | 9.7 a   | 9.1 ab |        |
| Mean MR                                | 7.65 a                                          |       | 6.10 b   |       |        | 8.75 b                                          |       | 9.40 a  |        |        |
| Mean Cv                                | HKE = 7.35a, LKE = 6.40b                        |       |          |       |        | HKE = 9.7a, LKE= 8.7a                           |       |         |        |        |
|                                        | N agronomic use efficiency (mg SCY /mg N)       |       |          |       |        | K agronomic use efficiency (mg SCY /mg N)       |       |         |        |        |
| 0-0                                    | -                                               | -     | -        | -     |        | -                                               | -     | -       | -      | -      |
| 375-0                                  | 26.9                                            | 21.6  | 9.1      | 13.6  | 17.8 c | -                                               | -     | -       | -      | -      |
| 750-0                                  | 24.5                                            | 19.3  | 12.4     | 11.9  | 17.0 c | -                                               | -     | -       | -      | -      |
| 0-208                                  | -                                               | -     | -        | -     |        | 44.2                                            | 34.1  | 12.5    | 20.2   | 27.8 c |
| 375-208                                | 66.9                                            | 48.5  | 63.7     | 49.1  | 57.1 a | 116.3                                           | 82.7  | 111.1   | 84.1   | 98.6 a |
| 750-208                                | 37.1                                            | 28.5  | 35.5     | 27.5  | 32.2 b | 89.4                                            | 67.3  | 95.7    | 76.4   | 82.2 b |
| Cv x MR                                | 25.9a                                           | 19.7b | 20.1b    | 17.0c |        | 41.7 a                                          | 30.7c | 36.5 b  | 30.1c  |        |
| Mean MR                                | 22.8a                                           |       | 18.6b    |       |        | 36.2a                                           |       | 33.3b   |        |        |
| Mean Cv                                | HKE = 36.0 a, LKE = 28.2 b                      |       |          |       |        | HKE = 39.1a, LKE = 30.4b                        |       |         |        |        |

Means not sharing the same letter within a column differ significantly at  $P < 0.05$  by LSD test. \* Full available moisture contents (100% irrigation), ‡50% reduced available moisture content

**Supplementary Table S4.** Effect of applied N: K levels on physiological and internal utilization efficiency in cotton cultivars under varied irrigation levels.

| N: K levels<br>(mg pot <sup>-1</sup> ) | N physiological use efficiency (mg mg <sup>-1</sup> ) |       |          |        | Mean    | K physiological use efficiency (mg mg <sup>-1</sup> ) |         |         |        | Mean    |
|----------------------------------------|-------------------------------------------------------|-------|----------|--------|---------|-------------------------------------------------------|---------|---------|--------|---------|
|                                        | ×100% AWC                                             |       | ÷50% AWC |        |         | 100% AWC                                              |         | 50% AWC |        |         |
|                                        | HKE                                                   | LKE   | HKE      | LKE    |         | HKE                                                   | LKE     | HKE     | LKE    |         |
| 0-0                                    | -                                                     | -     | -        | -      |         | -                                                     | -       | -       | -      | -       |
| 375-0                                  | 19.2                                                  | 19.5  | 17.6     | 16.5   | 18.2 a  | -                                                     | -       | -       | -      | -       |
| 750-0                                  | 16.9                                                  | 18.1  | 17.8     | 18.9   | 17.9 a  | -                                                     | -       | -       | -      | -       |
| 0-208                                  | -                                                     | -     | -        | -      |         | 14.1                                                  | 19.2    | 20.1    | 14.9   | 17.1 a  |
| 375-208                                | 14.9                                                  | 15.2  | 16.8     | 19.9   | 16.7 a  | 13.9                                                  | 13.0    | 16.2    | 18.3   | 15.4 ab |
| 750-208                                | 12.3                                                  | 10.5  | 14.8     | 18.3   | 14.0 ab | 8.8                                                   | 5.6     | 11.4    | 13.8   | 9.9 b   |
| Cv x MR                                | 10.6c                                                 | 10.6c | 11.2b    | 12.3a  |         | 6.1c                                                  | 6.3c    | 7.9 a   | 7.8 b  |         |
| Mean MR                                | 10.60b                                                |       | 11.75a   |        |         | 6.20 b                                                |         | 7.85 a  |        |         |
| Mean Cv                                | HKE = 10.9a, LKE = 11.45b                             |       |          |        |         | HKE = 7.0a, LKE= 7.1a                                 |         |         |        |         |
|                                        | N internal use efficiency (mg mg <sup>-1</sup> )      |       |          |        |         | K internal use efficiency (mg mg <sup>-1</sup> )      |         |         |        |         |
| 0-0                                    | -                                                     | -     | -        | -      |         | -                                                     | -       | -       | -      | -       |
| 375-0                                  | 14.7                                                  | 16.0  | 8.7      | 21.3   | 15.2 a  | -                                                     | -       | -       | -      | -       |
| 750-0                                  | 13.2                                                  | 12.5  | 11.6     | 15.2   | 13.1 b  | -                                                     | -       | -       | -      | -       |
| 0-208                                  | -                                                     | -     | -        | -      |         | 11.4                                                  | 16.8    | 6.1     | 14.4   | 12.2 c  |
| 375-208                                | 13.7                                                  | 13.0  | 17.8     | 16.1   | 15.2 a  | 17.1                                                  | 15.0    | 20.6    | 17.4   | 17.5 a  |
| 750-208                                | 8.8                                                   | 8.9   | 13.2     | 12.5   | 10.9 c  | 13.8                                                  | 12.9    | 17.5    | 15.5   | 14.9 b  |
| Cv x MR                                | 8.4 b                                                 | 8.4 b | 8.6 b    | 10.9 a |         | 7.06b                                                 | 7.47 ab | 7.37 ab | 7.89 a |         |
| Mean MR                                | 4.4b                                                  |       | 10.9a    |        |         | 7.27a                                                 |         | 7.63a   |        |         |
| Mean Cv                                | HKE = 8.5 b, LKE = 9.7 a                              |       |          |        |         | HKE = 7.22a, LKE = 7.68a                              |         |         |        |         |

Means not sharing the same letter within a column differ significantly at  $P<0.05$  by LSD test. × Full available moisture contents, ÷50% reduced available moisture content

**Supplementary Table S5. Pearson's correlation matrix for nutrient use efficiency indices determining nutrient efficiency of cultivars under AWC-50%**

| <i>Parameters</i> | SCY       | NAE       | KAE       | NPE       | KPE       | NARE      | KARE      | NEU       | KEU       | NIE       | KIE       | NER        | KER       | LN      | LK      | NU      |
|-------------------|-----------|-----------|-----------|-----------|-----------|-----------|-----------|-----------|-----------|-----------|-----------|------------|-----------|---------|---------|---------|
| SCY               | 1         |           |           |           |           |           |           |           |           |           |           |            |           |         |         |         |
| NAE               | 0.882**   | 1         |           |           |           |           |           |           |           |           |           |            |           |         |         |         |
| KAE               | 0.947**   | 0.867**   | 1         |           |           |           |           |           |           |           |           |            |           |         |         |         |
| NPE               | -0.069NS  | -0.147 NS | -0.025 NS | 1         |           |           |           |           |           |           |           |            |           |         |         |         |
| KPE               | -0.006 NS | 0.014 NS  | -0.234 NS | 0.072 NS  | 1         |           |           |           |           |           |           |            |           |         |         |         |
| NARE              | 0.882**   | 0.994**   | 0.838**   | -0.16 NS  | 0.085 NS  | 1         |           |           |           |           |           |            |           |         |         |         |
| KARE              | 0.946**   | 0.860**   | 0.995**   | 0.014 NS  | -0.246 NS | 0.830**   | 1         |           |           |           |           |            |           |         |         |         |
| NEU               | 0.866**   | 0.992**   | 0.826**   | -0.154 NS | 0.074 NS  | 0.998**   | 0.816**   | 1         |           |           |           |            |           |         |         |         |
| KEU               | 0.942**   | 0.875**   | 0.996**   | -0.009 NS | -0.237 NS | 0.844**   | 0.995**   | 0.834**   | 1         |           |           |            |           |         |         |         |
| NIE               | -0.167 NS | -0.165 NS | -0.092 NS | 0.777**   | 0.179 NS  | -0.167 NS | -0.098 NS | -0.167 NS | -0.119 NS | 1         |           |            |           |         |         |         |
| KIE               | 0.062 NS  | 0.116 NS  | -0.082 NS | 0.097 NS  | 0.896**   | 0.149 NS  | -0.105 NS | 0.129 NS  | -0.098 NS | 0.315 NS  | 1         |            |           |         |         |         |
| NER               | -0.056 NS | -0.085 NS | 0.15 NS   | .0676*    | -0.522 NS | -0.156 NS | 0.165 NS  | -0.151 NS | 0.14 NS   | 0.656*    | -0.275 NS | 1          |           |         |         |         |
| KER               | 0.351 NS  | 0.344 NS  | 0.152 NS  | -0.204 NS | 0.783**   | 0.387 NS  | 0.113 NS  | 0.372 NS  | 0.139 NS  | -0.046 NS | 0.828**   | -0.45 NS 9 | 1         |         |         |         |
| LN                | 0.937**   | 0.825**   | 0.797**   | -0.203 NS | 0.276 NS  | 0.855**   | 0.787**   | 0.839**   | 0.792**   | -0.267 NS | 0.258 NS  | -0.349 NS  | 0.585*    | 1       |         |         |
| LK                | 0.914**   | 0.783**   | 0.939**   | 0.141 NS  | -0.285 NS | 0.762**   | 0.962**   | 0.751**   | 0.947**   | -0.054 NS | -0.218 NS | 0.231 NS   | -0.011 NS | 0.744** | 1       |         |
| NU                | 0.987**   | 0.865**   | 0.891**   | -0.143 NS | 0.101 NS  | 0.880**   | 0.887**   | 0.864**   | 0.886**   | -0.236 NS | 0.122 NS  | -0.203 NS  | 0.438 NS  | 0.977** | 0.851** | 1       |
| KU                | 0.985**   | 0.863**   | 0.960**   | -0.007 NS | -0.128 NS | 0.856**   | 0.971**   | 0.841**   | 0.961**   | -0.152 NS | -0.067 NS | 0.033 NS   | 0.193 NS  | 0.878** | 0.966** | 0.954** |

SCY: Seed cotton yield

NAE: Nitrogen agronomic efficiency:

KAE: Potassium agronomic efficiency:

NPE: Nitrogen physiological efficiency

KPE: Potassium physiological efficiency

NARE: Nitrogen apparent recovery efficiency

\*\*= Highly significant at  $p \leq 0.01$ ;

KARE : Potassium apparent recovery efficiency

NEU : Nitrogen utilization efficiency

KEU : Potassium utilization efficiency

NIE : Nitrogen internal utilization efficiency

KIE : Potassium internal utilization efficiency

NER : Nitrogen efficiency ratio

\* = Significant at  $p \leq 0.05$

KER : Potassium efficiency ratio

LN : Leaf nitrogen concentration

LK : Leaf Potassium concentration

NU : Total nitrogen uptake

KU : Total potassium uptake

NS = Non-significant

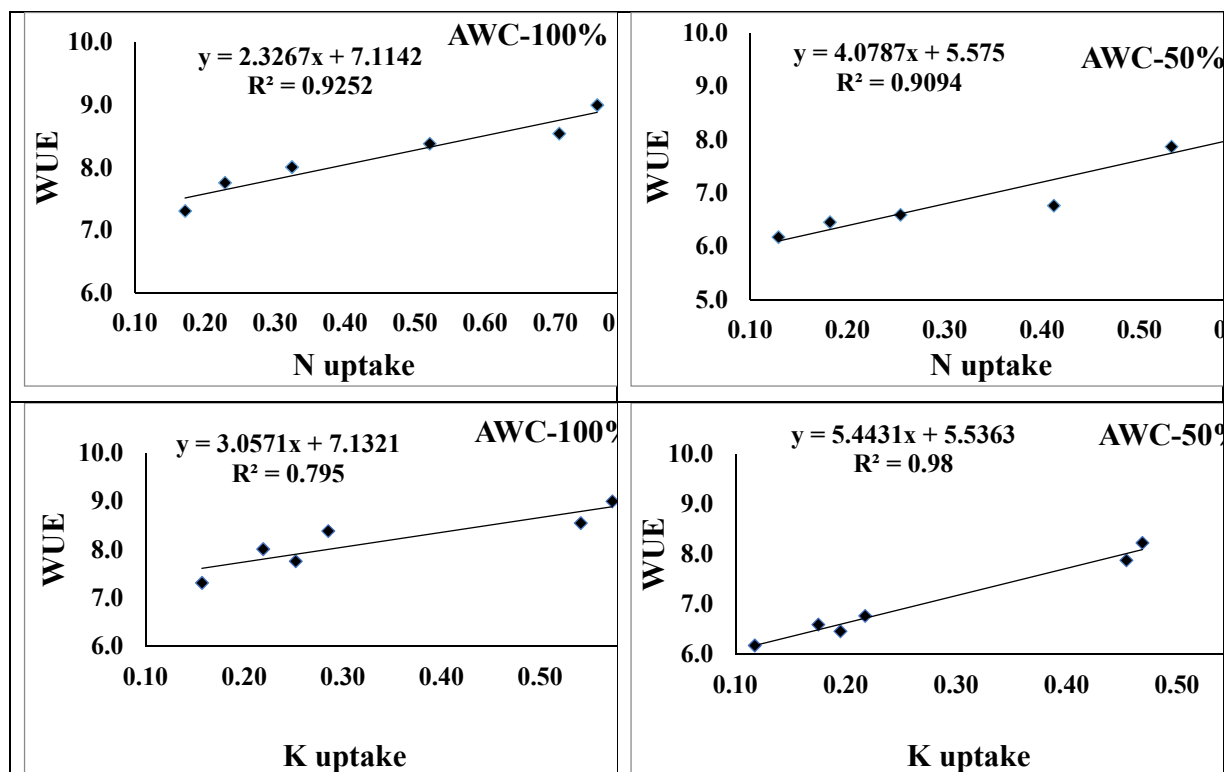

**Supplementary Figure S1** Correlation between water use efficiency and nitrogen and potassium uptake of cultivars under varied irrigation levels

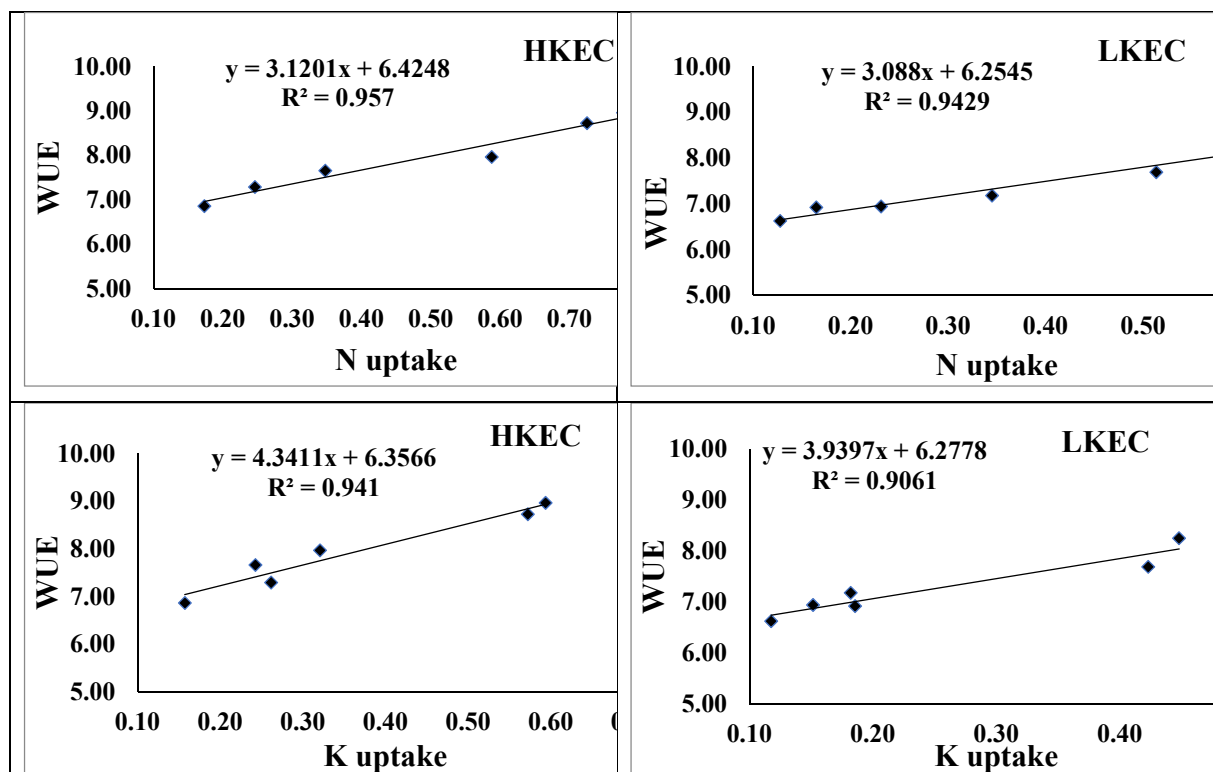

**Supplementary Figure S2** Correlation between water use efficiency and nitrogen and potassium uptake of cultivars.
